# Supplementary material for: Low Zinc Alleviates the Progression of Thoracic Aortic Dissection by Inhibiting Inflammation
Source: MDPI journal article supplement (doi:10.3390/nu15071640), 2023-03-28
Supplement: s1 [file s1]

Supplementary Table S1. Primers for Q-PCR analysis.

| Gene                            | Forward                 | Reverse                 |
|---------------------------------|-------------------------|-------------------------|
| <i><math>\beta</math>-Actin</i> | CTATTGGCAACGAGCGGT      | GGTCTTTACGGATGTCAACG    |
| <i>Col1A1</i>                   | AGCAGACGGGAGTTTCTCCTC   | GACATGTAGACTCTTTGCGGC   |
| <i>Cxcl2</i>                    | GCGGTCAAAAAGTTTGCCTTG   | CAGGTACGATCCAGGCTTCC    |
| <i>Fn1</i>                      | ATGTGGACCCCTCCTGATAGT   | GCCCAGTGATTTTCAGCAAAGG  |
| <i>Myh11</i>                    | CTCCCAACCTTTCCCTGACC    | AGTGTGATTGCTCTGCTCCG    |
| <i>Acta2</i>                    | GTTTTGTGGATCAGCGCCTC    | TTCCTGACCACTAGAGGGGG    |
| <i>Myl9</i>                     | GCGCCGAGGACTTTTCTTCT    | TCTTGGCCTTGGCTCTCTTG    |
| <i>Cnn1</i>                     | GCAGTGGACACACGCATTTT    | AACAACCTGGCCCCAAGACTC   |
| <i>Ramp1</i>                    | GAGACTATTGGGAAGACGCTATG | CTCCTCCAGACCACCAGTG     |
| <i>TNF-<math>\alpha</math></i>  | CCCTCACACTCAGATCATCTTCT | GCTACGACGTGGGCTACAG     |
| <i>TNFAIP3</i>                  | GAACAGCGATCAGGCCAGG     | GGACAGTTGGGTGTCTCACATT  |
| <i>TNFSF10</i>                  | ATGGTGATTTGCATAGTGCTCC  | GCAAGCAGGGTCTGTTCAAGA   |
| <i>TNFSF9</i>                   | CGGCGCTCCTCAGAGATAC     | ATCCCGAACATTAACCGCAGG   |
| <i>TNFRSF1A</i>                 | CCGGGAGAAGAGGGATAGCTT   | TCGGACAGTCACTACCAAGT    |
| <i>IL-1<math>\beta</math></i>   | GCAACTGTTCCCTGAACTCAACT | ATCTTTTGGGGTCCGTCAACT   |
| <i>IL-6</i>                     | TAGTCCTTCCTACCCCAATTTCC | TTGGTCCTTAGCCACTCCTTC   |
| <i>IL-10</i>                    | GCTCTTACTGACTGGCATGAG   | CGCAGCTCTAGGAGCATGTG    |
| <i>MCP-1</i>                    | TTAAAAACCTGGATCGGAACCAA | GCATTAGCTTCAGATTTACGGGT |
| <i>MMP9</i>                     | CTGGACAGCCAGACACTAAAG   | CTCGCGGCAAGTCTTCAGAG    |
| <i>MMP2</i>                     | CAAGTTCCCCGGCGATGTC     | TTCTGGTCAAGGTCACCTGTC   |
| <i>ADAMTS</i>                   | CATAACAATGCTGCTATGTGCG  | TGTCCGGCTGCAACTTCAG     |

Supplementary Table S2. Antibodies for western blot.

| Antibody       | Vendor name     | Catalog number | Dilution |
|----------------|-----------------|----------------|----------|
| $\beta$ -Actin | Proteintech     | 81115-1-RR     | 1:5000   |
| MYH11          | Abcam           | ab124679       | 1:1000   |
| ACTA2          | Cell signalling | 19245          | 1:1000   |
| CNN1           | Proteintech     | 26689-1-AP     | 1:1000   |
| TNF- $\alpha$  | Proteintech     | 60291-1-AP     | 1:1000   |
| IL-1 $\beta$   | Proteintech     | 26048-1-AP     | 1:1000   |
| IL-6           | Abcam           | ab259341       | 1:1000   |
